# Supplementary material
Source: publisher figshare collection journal article supplement (https://f1000.figshare.com/ndownloader/files/3570890)
Supplement: Supplementary file 1 [file 3570890]

Replicate	CONTROL	IGF-I	H2O2	I+H
n1	1	0.988	1.192	0.864
n2	1	1.097	1.963	0.957
n3	1	0.886	1.171	1.019
n4	1	1.035	1.342	1.14
n5	1	1.092	1.257	1
n6	1	1.021	1.313	1.143
MEAN	1	1.02	1.373	1.02
SEM	0	0.032	0.121	0.044
